# Supplementary material
Source: publisher site journal article supplement (https://www.dovepress.com/article/484751)
Supplement: Supplementary file 1 [file get_supplementary_file.php]

Supplementary table 1. Sequences of primers for qRT-PCR

| Gene name | Primer sequence（5'to 3'） | | Product length | GenBank accession no. |
| --- | --- | --- | --- | --- |
| RUNX2 | Forward | CTCTACTATGGCACTTCGTCAGG | 158 | NM_001278478.2 |
| Reverse | TCAGCGTCAACACCATCATTC |
| SPP1 | Forward | GGGAAGGACAGTTATGAAACGAG | 133 | NM_000582.3 |
| Reverse | CCTGACTATCAATCACATCGGAAT |
| BGLAP | Forward | GAGGGCAGCGAGGTAGTGAA | 182 | NM_199173.6 |
| Reverse | TAGACCGGGCCGTAGAAGC |
| ALPL | Forward | CTTCAAACCGAGATACAAGCACTC | 137 | NM_000478.6 |
| Reverse | CGTTGTTCCTGTTCAGCTCGTAC |
| β-actin | Forward | CACCATTGGCAATGAGCGGTTC | 135 | NM_001101.5 |
| Reverse | AGGTCTTTGCGGATGTCCAGGT |
| miR-21-5p | Forward | TAGCTTATCAGACTGATGTTGAAAA | 75 | MIMAT0000076 |
| miR-125b-5p | Forward | CCCTGAGACCCTAACTTGTGAAA | 74 | MIMAT0000423 |
| miR-100-5p | Forward | CGTAGATCCGAACTTGTGAA | 75 | MIMAT0000098 |
| miR-221-3p | Forward | TACATTGTCTGCTGGGTTTCAAA | 73 | MIMAT0000278 |
| miR-199a-3p | Forward | ACAGTAGTCTGCACATTGGTTAAA | 75 | MIMAT0000232 |
| let-7i-5p | Forward | TGAGGTAGTAGTTTGTGCTGTTAA | 75 | MIMAT0000415 |
| let-7a-5p | Forward | TGAGGTAGTAGGTTGTATAGTTAAA | 75 | MIMAT0000062 |
| let-7f-5p | Forward | TGAGGTAGTAGATTGTATAGTTAAA | 75 | MIMAT0000067 |
| miR-143-3p | Forward | TGAGATGAAGCACTGTAGCTCAAA | 74 | MIMAT0000435 |
| miR-29a-3p | Forward | CACCATCTGAAATCGGTTAA | 72 | MIMAT0000086 |
| miR-16-5p | Forward | CAGCACGTAAATATTGGCGAA | 72 | MIMAT0000069 |
| miR-23a-3p | Forward | GCCAGGGATTTCCAAAA | 66 | MIMAT0000078 |
| miR-144-3p | Forward | CCGCTACAGTATAGATGATGTACTAA | 77 | MIMAT0000436 |


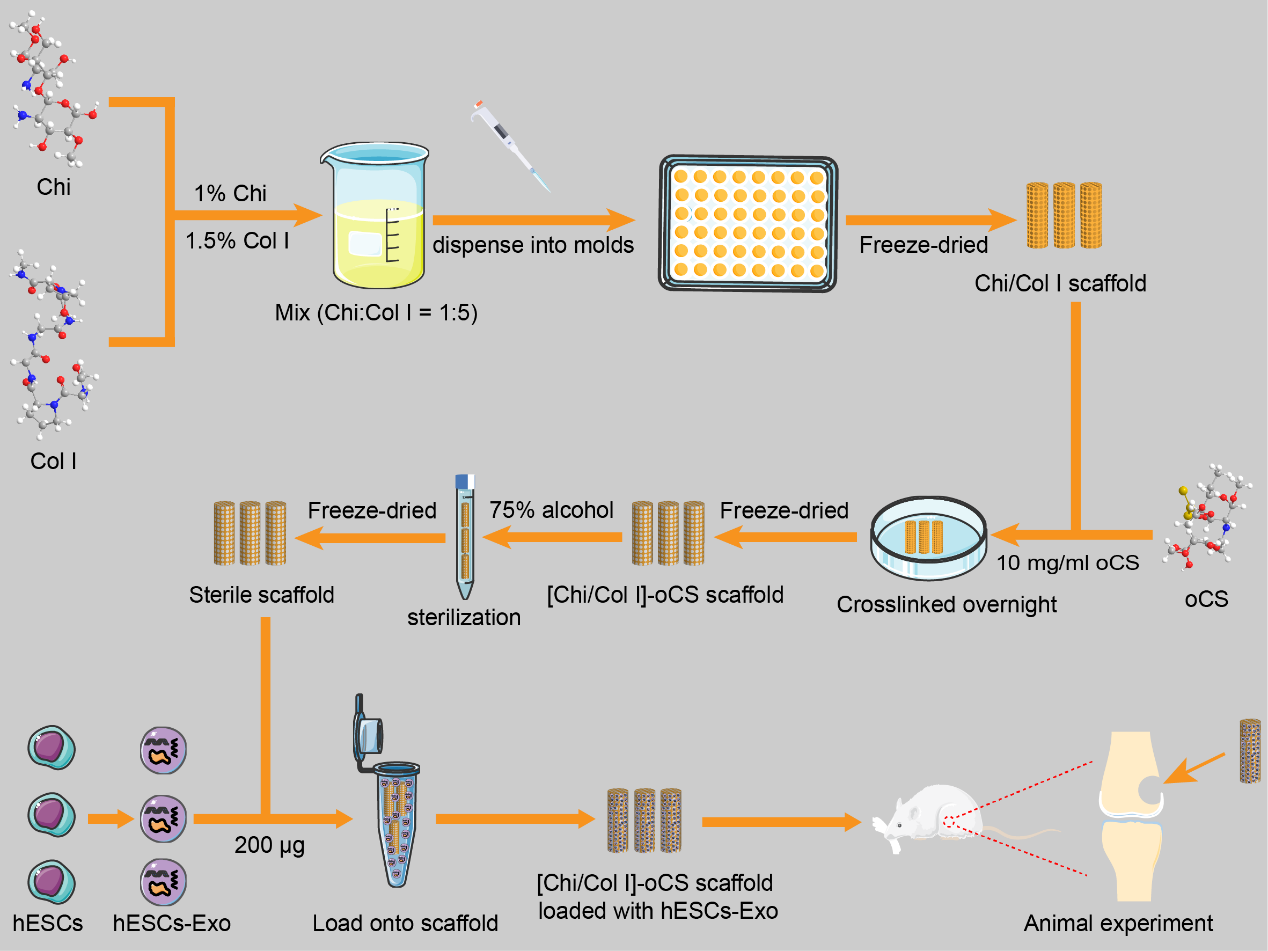


Supplementary Figure 1. Schematic illustration of the [Chi/ColⅠ]-oCS preparation process.


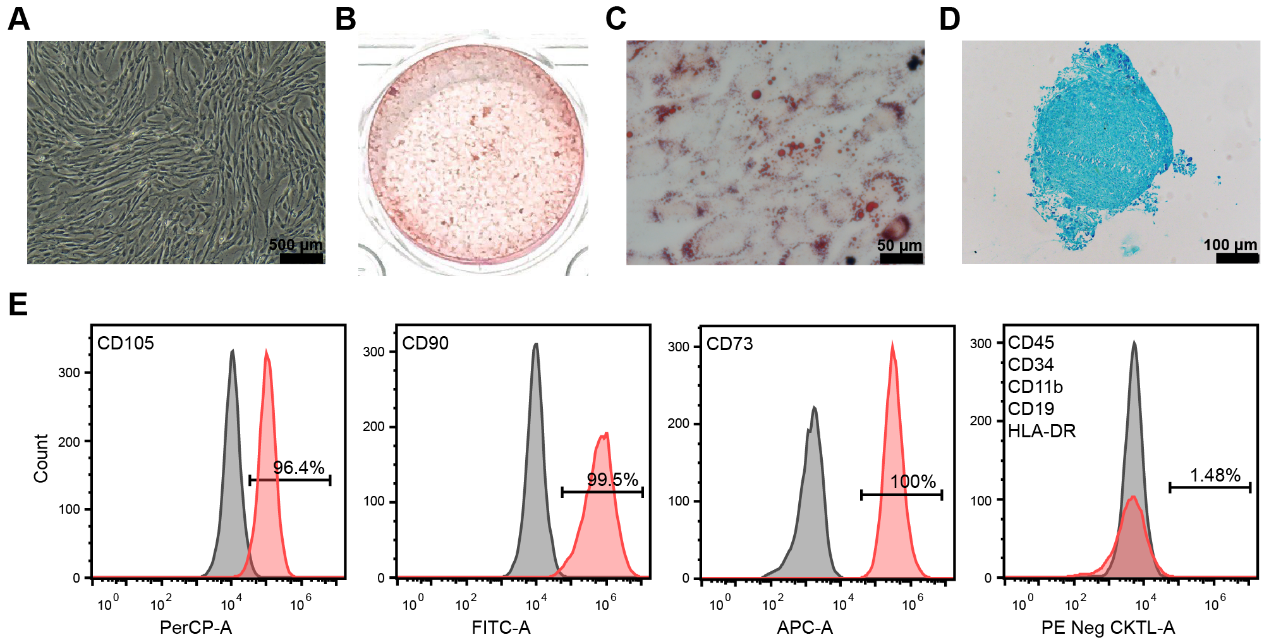


Supplementary Figure 2. Identification and characterization of hUCMSCs. (A) Representative images highlighting the spindle-like morphology of hUCMSCs, which exhibited a typical spindle-like shape following 3 days of primary isolation and culture. Scale bar: 500 μm. (B) Validation of the osteogenic differentiation of hUCMSCs. Alizarin Red staining revealed the presence of mineralized nodules, indicating the osteogenic differentiation capability of the hUCMSCs. (C) Confirmation of the adipogenic differentiation of hUCMSCs. Oil Red O staining revealed the accumulation of lipid droplets, underscoring the adipogenic differentiation ability of hUCMSCs. (D) Demonstration of the chondrogenic differentiation of hUCMSCs. Alcian blue staining revealed the production of acidic polysaccharides, indicating the chondrogenic differentiation potential of hUCMSCs. (E) Characterization of surface markers of hUCMSCs as evaluated by flow cytometry. The black curves represent isotype controls, while the red curves represent the specific surface markers.


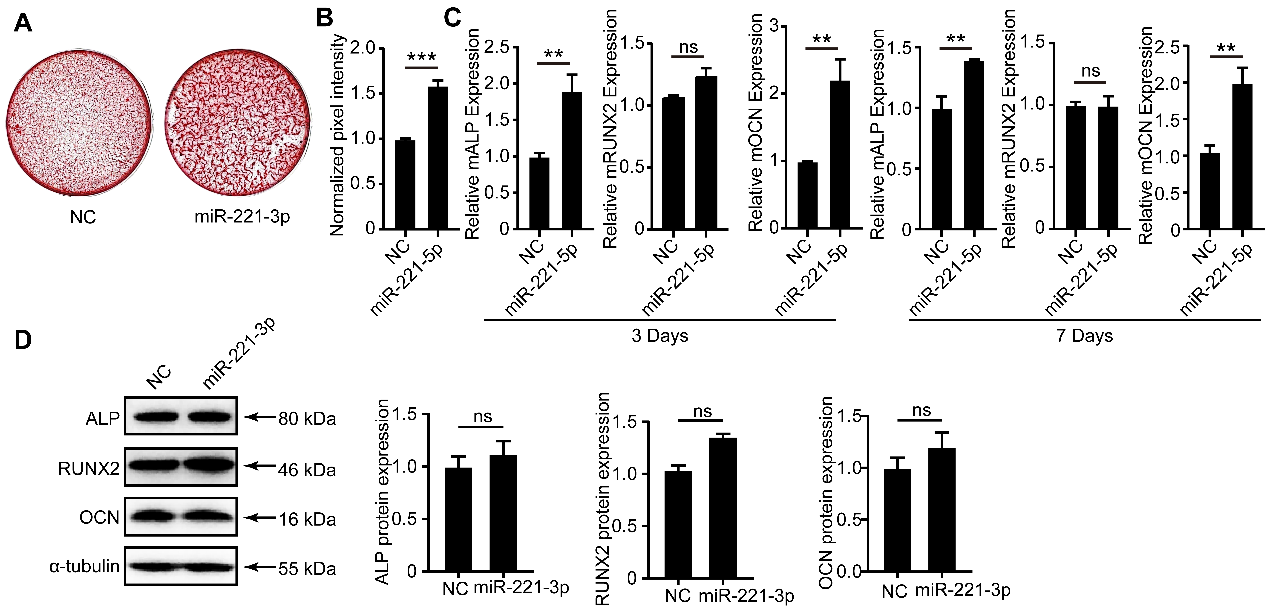


Supplementary Figure 3. Limited promotion of osteogenic differentiation in hUCMSCs by miR-221-3p. (A) Representative images showing alizarin red staining after 14 days of osteogenic induction indicating enhanced calcification in the miR-221-3p-transfected group relative to the control (NC) group. (B) Quantitative evaluation of alizarin red staining intensity using Photoshop software. (C) mRNA expression profiles of ALP, RUNX2, and OCN on days 3 and 7 postosteogenic induction, as determined by qRT‒PCR. (D) The protein levels of ALP, RUNX2, and OCN in hUCMSCs were measured by western blotting and statistically analyzed via ImageJ normalization, and the protein levels were normalized to the α-tubulin levels. The data are presented as the means ± SDs; n=3; ***P*<0.01, ****P*<0.001; ‘ns’ indicates no significant difference.
